# Supplementary material for: Snakes as food. Determinants of behavior intention to consume Gaboon viper (Bitis gabonica) in Ghana
Source: Research Square preprint supplement (doi:10.21203/rs.3.rs-6165893/v1), 2025-05-15
Supplement: Supplementary file 1 [file aca33b8c4cd84ea29d1b96ea.docx]

**Supplementary Information**

**Consumption intention of snake meat questionnaire**

***Demographic information***

***Section A: Demographic information***

1. Gender Male [ ] Female [ ]

2. Age group: 18- 20 [ ] 21-30 [ ] 31-40 [ ] 41-50 [ ] 51-60 [ ] Above 60

3. Last level of education of respondent: No formal education [ ] Basic/Primary [ ] JHS [ ] MSLC [ ] SHS [ ] Tertiary [ ]

4. Family monthly income (in Ghana Cedis): Less than 500 [ ] 500 – 999 [ ] 1000 – 1499 [ ] 1500-2000 [ ] Above 2000 [ ]

5. Marital status: Single [ ] Married [ ] Divorced [ ] Widowed [ ]

***Section B: Level of agreement with TPB, WVOs, and Perceived susceptibility questions***

| S/N | Measurement items | **References** |
| --- | --- | --- |
|  | ***Intention*** | Powers (2023), D’Souza (2022) |
| INT1 | I plan to eat a snake |
| INT2 | I intend to consume snake |
| INT3 | I am willing to recommend that others consume snake |
|  | ***Attitude*** | Castellini and Graffigna (2024), Simo et al. (2024), Zhu et al. (2024), Bannor et al. (2022), D’Souza (2022) |
| ATT1 | Snake meat tastes good |
| ATT2 | Snake meat is healthy |
| ATT3 | Snake meat is culturally appropriate |
| ATT4 | Snake meat is safe to consume |
|  | ***Subjective Norm*** | Castellini and Graffigna (2024), Zhu et al. (2024), D’Souza (2022) |
| SN1 | Most people who are important to me would approve of me consuming snake meat |
| SN2 | My friends would approve of me consuming snake meat |
| SN3 | My family would approve of me consuming snake meat |
|  | ***Perceived Behavioral Control*** | Castellini and Graffigna (2024), Powers (2023), D’Souza (2022) |
| PBC1 | Whether or not I consume snake meat is entirely up to me |
| PBC2 | I am confident that if I wanted, I could consume snake meat |
| PBC3 | For me, snake meat is readily available to me |
|  | ***Perceived Susceptibility*** | Abukari and Kankam (2024) |
| PS1 | I have an increased risk of getting zoonotic diseases if I snake meat |
| PS2 | I am concerned about the risk of getting zoonotic diseases from snake meat consumption and spreading it to other people |
| PS3 | I feel I will get some zoonosis sometime in my life through snake meat consumption. |
|  | ***Appropriate use beliefs*** | Keener-Eck et al. (2020) Ehrhart et al. (2021) |
| AUB1 | Humans should manage wild animal populations so that humans benefit |
| AUB2 | The needs of humans should take priority over wildlife protection |
| AUB3 | Wildlife are on earth primarily for people to use |
|  | ***Social Affiliation beliefs*** | Keener-Eck et al. (2020) Ehrhart et al. (2021) |
| SAB1 | We should strive for a world where humans and wildlife can live side by side without fear. |
| SAB2 | I view all living things as part of one big family. |
| SAB3 | Animals should have rights similar to the rights of humans. |
| SAB4 | Wildlife are like my family and I want to protect them. |
